# Supplementary material
Source: PubMed Central journal article supplement (PMC5412897)
Supplement: EMBR-18-712-s001.pdf [file EMBR-18-712-s001.pdf]

## **APPENDIX**

### **-Appendix Table S1: Quantitative Real-Time PCR Primers**

**Appendix Table S1: Quantitative Real-Time PCR Primers**

| Gene          | Primer Sequence                                                    | UPL Probe |
|---------------|--------------------------------------------------------------------|-----------|
| <i>hGAPDH</i> | Forward: GCATCCTGGGCTACACTGAG<br>Reverse: AGGTGGAGGAGTGGGTGTC      | 82        |
| <i>hAXIN2</i> | Forward: CCACACCCTTCTCCAATCC<br>Reverse: TGCCAGTTTCTTTGGCTCTT      | 36        |
| <i>hGPR37</i> | Forward: ATCTTCCACGAGCTGACCAA<br>Reverse: TGAAAGTGGTGA CTCCCAGA    | 2         |
| <i>hLRP5</i>  | Forward: GAACATCAAGCGAGCCAAG<br>Reverse: TGGCTCAGAGAGGTCAAACA      | 23        |
| <i>hLRP6</i>  | Forward: CAGCTTCTGTGCTCCTGA<br>Reverse: TCCAGCACGTTCTATCTTTGG      | 7         |
| <i>hCHOP</i>  | Forward: CAGAGCTGGAACCTGAGGAG<br>Reverse: TGGATCAGTCTGGAAAAGC      | 9         |
| <i>mGapdh</i> | Forward: AGCTTGTCATCAACGGGAAG<br>Reverse: TTTGATGTTAGTGGGTCTCG     | 9         |
| <i>mHprt</i>  | Forward: TCCTCCTCAGACCGCTTT<br>Reverse: CCTGGTTCATCATCGCTAATC      | 95        |
| <i>mGpr37</i> | Forward: CCTGGTCATCTTCCATGAGTT<br>Reverse: ACACCCAGAAAGCCACCT      | 2         |
| <i>mAxin2</i> | Forward: CCATGACGGACAGTAGCGTA<br>Reverse: GCCATTGGCCTTCACACT       | 50        |
| <i>mSp5</i>   | Forward: AGGACAGGAAACTGGGTCGT<br>Reverse: GATGGCTCGGACTTTGGA       | 79        |
| <i>mLrp5</i>  | Forward: CATGGACATCCAAGTGCTGA<br>Reverse: TTGTCCTCCTCGCATGGT       | 75        |
| <i>mLrp6</i>  | Forward: TCCTCGAGCTCTGGCACT<br>Reverse: CCTCCCCACTCAGTCCAATA       | 18        |
| <i>mDcx</i>   | Forward: AGCTGACTCAGGTAACGACCA<br>Reverse: GCTTTGACTTAGGTGTTGAGAGC | 11        |
| <i>mCspg4</i> | Forward: CTTGGCCTTGTTGGTCAGAT<br>Reverse: CACCTCCAGGTGGTTCTCC      | 16        |

|                |                                                                 |    |
|----------------|-----------------------------------------------------------------|----|
| <i>mNestin</i> | Forward: TCCTTAGTCTGGAAGTGGCTA<br>Reverse: GGTGTCTGCAAGCGAGAGTT | 67 |
| <i>mSox2</i>   | Forward: GGCAGAGAAGAGAGTGTTTGC<br>Reverse: TCTTCTTTCTCCCAGCCCTA | 34 |
